# Supplementary material for: Baseline Objective Malnutritional Indices as Immune-Nutritional Predictors of Long-Term Recurrence in Patients with Acute Ischemic Stroke
Source: MDPI journal article supplement (doi:10.3390/nu14071337), 2022-03-23
Supplement: s1 [file s1]

**Supplementary Table S2.** Multivariate analysis of two malnutrition indexes to predict major cardiovascular events.

| Index                      | Model 1 <sup>†</sup> |                  | Model 2 <sup>‡</sup> |                  | Model 3 <sup>§</sup> |                  |
|----------------------------|----------------------|------------------|----------------------|------------------|----------------------|------------------|
|                            | adjustedHR (95%CI)   | <i>P</i>         | adjustedHR(95%CI)    | <i>P</i>         | adjustedHR(95%CI)    | <i>P</i>         |
| PNI categories             |                      |                  |                      |                  |                      |                  |
| Tertile1(≤44.75)           | 1.0 [Reference]      |                  | 1.0 [Reference]      |                  | 1.0 [Reference]      |                  |
| Tertile2(44.76-48.9)       | 0.320(0.231-0.442)   | <b>&lt;0.001</b> | 0.318(0.230-0.441)   | <b>&lt;0.001</b> | 0.232(0.233-0.447)   | <b>&lt;0.001</b> |
| Tertile3( > 48.9)          | 0.449(0.329-0.614)   | <b>&lt;0.001</b> | 0.443(0.322-0.610)   | <b>&lt;0.001</b> | 0.450(0.327-0.618)   | <b>&lt;0.001</b> |
| PNI per 1-point increase   | 0.931(0.908-0.953)   | <b>&lt;0.001</b> | 0.927(0.904-0.951)   | <b>&lt;0.001</b> | 0.928(0.905-0.952)   | <b>&lt;0.001</b> |
| PNI as bivariate (≤ 44.75) | 2.646(2.045-3.424)   | <b>&lt;0.001</b> | 2.679(2.0618-3.479)  | <b>&lt;0.001</b> | 2.642 (2.033-3.434)  | <b>&lt;0.001</b> |
| CONUT categories           |                      |                  |                      |                  |                      |                  |
| Normal                     | 1.0 [Reference]      |                  | 1.0 [Reference]      |                  | 1.0 [Reference]      |                  |
| Mild                       | 1.388(1.058-1.821)   | <b>0.017</b>     | 1.406(1.066-1.845)   | <b>0.015</b>     | 1.352(1.029-1.777)   | <b>0.03</b>      |
| Moderate-severe            | 3.483(2.356-5.150)   | <b>&lt;0.001</b> | 3.359(2.238-5.041)   | <b>&lt;0.001</b> | 3.288(2.195-4.927)   | <b>&lt;0.001</b> |
| CONUT as bivariate (> 1)   | 1.580(1.129-2.048)   | <b>&lt;0.001</b> | 1.577(1.212-2.505)   | <b>&lt;0.001</b> | 1.513 (1.163-1.967)  | <b>0.002</b>     |
| CONUT per 1-point increase | 1.193(1.119-1.270)   | <b>&lt;0.001</b> | 1.194(1.116-1.276)   | <b>&lt;0.001</b> | 1.190(1.115-1.275)   | <b>&lt;0.001</b> |

<sup>†</sup>Model 1, adjusted for age, sex.

<sup>‡</sup>Model 2, adjusted for age, sex, stroke etiology, smoking status, and history of ischemic stroke, history of diabetes mellitus, history of hypertension, NIHSS at admission.

<sup>§</sup>Model 3, adjusted for age, serum creatinine, stroke etiology, history of ischemic stroke, history of hypertension, platelet count, neurological deterioration.
