# Supplementary material for: Baseline Objective Malnutritional Indices as Immune-Nutritional Predictors of Long-Term Recurrence in Patients with Acute Ischemic Stroke
Source: MDPI journal article supplement (doi:10.3390/nu14071337), 2022-03-23
Supplement: s1 [file s1]

**Table S1.** Univariate Cox regression analysis according to patients with and without recurrent ischemic stroke.

| Variable                  | HR    | 95%CI       | <i>p</i>         | Variable              | HR        | 95%CI       | <i>p</i>         |
|---------------------------|-------|-------------|------------------|-----------------------|-----------|-------------|------------------|
| Age                       | 1.03  | 1.02-1.05   | <b>&lt;0.001</b> | LDL, mmol/l           | 0.885     | 0.763-1.03  | 0.108            |
| Sex(male)                 | 1.14  | 0.839-1.56  | 0.394            | Triglyceric, mmol/l   | 0.916     | 0.802-1.05  | 0.200            |
| Diabetes mellitus         | 0.86  | 0.592-1.25  | 0.428            | TOAST                 |           |             | 0.043            |
| Hypertension              | 1.45  | 1.09-1.92   | <b>0.009</b>     | LAA                   | reference |             |                  |
| Ischemic Stroke           | 1.5   | 1.11-2.03   | <b>0.008</b>     | CE                    | 1.8       | 1.21-2.67   | <b>0.003</b>     |
| Cerebral hemorrhage       | 1.66  | 0.78-3.52   | 0.189            | SAA                   | 1.35      | 0.984-1.86  | 0.062            |
| Smoke status              | 1.09  | 0.823-1.43  | 0.563            | SOE                   | 1.34      | 0.582-3.08  | 0.492            |
| Baseline SBP, mmHg        | 0.995 | 0.989-1     | 0.111            | SUE                   | 0.85      | 0.37-1.96   | 0.702            |
| Baseline DBP, mmHg        | 0.993 | 0.983-1     | 0.226            | NIHSS at admission    | 1.02      | 0.979-1.06  | 0.382            |
| WBC, ×10 <sup>9</sup> /l  | 0.981 | 0.933-1.03  | 0.468            | ND                    | 0.462     | 0.258-0.829 | <b>0.009</b>     |
| NEU, ×10 <sup>9</sup> /l  | 1     | 0.955-1.06  | 0.857            | Premorbid mRS         | 1.208     | 0.975-1.408 | 0.083            |
| LYM, ×10 <sup>9</sup> /l  | 0.689 | 0.556-0.853 | <b>&lt;0.001</b> | Malnutrition index    |           |             |                  |
| RBC, ×10 <sup>12</sup> /l | 1     | 0.994-1.01  | 0.851            | CONUT score           | 1.24      | 1.16-1.32   | <b>&lt;0.001</b> |
| Hb,g/l                    | 0.996 | 0.988-1     | 0.360            | PNI score             | 0.917     | 0.893-0.94  | <b>&lt;0.001</b> |
| PLT, ×10 <sup>9</sup> /l  | 0.998 | 0.996-1     | 0.047            | CONUT categories      |           |             | <b>&lt;0.001</b> |
| ALT, u/l                  | 1     | 0.996-1.01  | 0.301            | absent                | reference |             |                  |
| ALB, g/l                  | 0.912 | 0.883-0.941 | <b>&lt;0.001</b> | mild                  | 1.44      | 1.07-1.94   | <b>0.017</b>     |
| Scr, μmol/l               | 1     | 1-1.01      | <b>0.014</b>     | moderate-severe       | 4.21      | 2.75-6.43   | <b>&lt;0.001</b> |
| FBS, mmol/l               | 0.996 | 0.94-1.06   | 0.890            | PNI categories        |           |             | <b>&lt;0.001</b> |
| TC, mg/dl                 | 0.931 | 0.826-1.05  | 0.245            | tertile1(≤44.75)      | reference |             |                  |
| HDL, mmol/l               | 1.17  | 0.758-1.8   | 0.480            | tertile2(44.76-48.90) | 0.266     | 0.184-0.384 | <b>&lt;0.001</b> |
|                           |       |             |                  | tertile3(>48.90)      | 0.371     | 0.267-0.515 | <b>&lt;0.001</b> |

Abbreviations: RIS, recurrent ischemic stroke; IQR, interquartile ranges; DM, diabetes mellitus; HTN, hypertension; IS, ischemic stroke; ICH, intracerebral hemorrhage; SBP, systolic blood pressure; DBP, diastolic blood pressure; WBC, white blood cell; NEU, leukocyte; LYM, lymphocyte; Hb, hemoglobin; RBC, red blood cell; PLT, platelet; ALT, alanine transaminase; ALB, albumin; Scr, serum creatinine; FBS, fasting blood sugar; TC, total cholesterol; HDL, high density lipoprotein; LDL, low density lipoprotein; TOAST, the trial of ORG 10172 in Acute Stroke Treatment; large-artery atherosclerosis; CE, cardioembolism; SAA, small-vessel occlusion; SOE, stroke of other determined etiology; SUE, stroke of undetermined etiology; NIHSS, National Institute of Health Stroke Scale; ND, neurological deterioration; mRS, modified Rankin Scale; CONUT, controlling nutritional status score; PNI, prognostic nutritional index.
